# Supplementary material
Source: PubMed Central journal article supplement (PMC5841540)
Supplement: NIHMS946244-supplement-Appendix.pdf [file NIHMS946244-supplement-Appendix.pdf]

**Appendix**  
**Breast Cancer in Young Women: Health State Utility Impacts by Race/Ethnicity**  
**Trogon et al.**

**Appendix Table 1.** Healthy Days For All Races/Ethnicities

| Health Days measure               | Diagnosed at age 18 to 44 |           |               | Diagnosed at age 45 or older |           |               |
|-----------------------------------|---------------------------|-----------|---------------|------------------------------|-----------|---------------|
|                                   | Breast cancer             | No cancer | Difference    | Breast cancer                | No cancer | Difference    |
| Overall healthy days <sup>a</sup> | 21.52                     | 23.20     | <b>-1.68*</b> | 22.29                        | 23.20     | <b>-0.91*</b> |
| Physically healthy days           | 24.19                     | 25.80     | <b>-1.61*</b> | 24.13                        | 25.80     | <b>-1.67*</b> |
| Mentally healthy days             | 25.50                     | 26.30     | <b>-0.80*</b> | 26.96                        | 26.30     | <b>0.66*</b>  |

*Note:* Boldface indicates statistically significant ( $p < 0.05$ ) difference between women with and without breast cancer. \* indicates statistically significant ( $p < 0.01$ ) difference between women with and without breast cancer.

<sup>a</sup> Overall healthy days = 30 – (physically unhealthy days) – (mentally unhealthy days); values <0 are set to 0. This measure is used in the health state utility value from Jia and Lubetkin.<sup>34</sup>

**Appendix**  
**Breast Cancer in Young Women: Health State Utility Impacts by Race/Ethnicity**  
Trogon et al.

**Appendix Table 2.** Mapped HSU Regression Analysis<sup>a</sup>

| Variable                                   | All races/ethnicities        |                                 | White                        |                                 |
|--------------------------------------------|------------------------------|---------------------------------|------------------------------|---------------------------------|
|                                            | Diagnosed at age<br>18 to 44 | Diagnosed at age<br>45 or older | Diagnosed at age<br>18 to 44 | Diagnosed at age<br>45 or older |
| Breast cancer                              | <b>-0.116* (0.018)</b>       | <b>-0.070* (0.007)</b>          | <b>-0.126* (0.021)</b>       | <b>-0.072* (0.008)</b>          |
| Years since breast cancer diagnosis        |                              |                                 |                              |                                 |
| 2 to 4 years                               | <b>0.065* (0.023)</b>        | <b>0.038* (0.008)</b>           | <b>0.084* (0.025)</b>        | <b>0.041* (0.009)</b>           |
| 5 to 10 years                              | <b>0.080* (0.021)</b>        | <b>0.056* (0.008)</b>           | <b>0.090* (0.024)</b>        | <b>0.057* (0.009)</b>           |
| More than 10 years                         | <b>0.091* (0.019)</b>        | <b>0.049* (0.008)</b>           | <b>0.101* (0.022)</b>        | <b>0.049* (0.009)</b>           |
| Race/ethnicity                             |                              |                                 |                              |                                 |
| White                                      | <b>0.007* (0.002)</b>        | <b>0.005* (0.002)</b>           | -                            | -                               |
| African American, non-Hispanic             | <b>0.013* (0.002)</b>        | <b>0.011* (0.002)</b>           | -                            | -                               |
| Other, non-Hispanic                        | 0.002 (0.002)                | Ref                             | -                            | -                               |
| Hispanic                                   | Ref                          | -0.002 (0.002)                  | -                            | -                               |
| Age                                        | <b>-0.003* (0.0001)</b>      | <b>-0.003* (0.0001)</b>         | <b>-0.002* (0.0001)</b>      | <b>-0.002* (0.0001)</b>         |
| Age squared                                | <b>1.9E-5* (1.3E-6)</b>      | <b>1.9E-5* (1.2E-6)</b>         | <b>1.3E-5* (1.4E-6)</b>      | <b>1.2E-5* (1.4E-6)</b>         |
| Household income <\$35,000/year            | <b>-0.055* (0.001)</b>       | <b>-0.055* (0.001)</b>          | <b>-0.057* (0.001)</b>       | <b>-0.057* (0.001)</b>          |
| BMI                                        | -0.001 (0.0004)              | -0.001 (0.0004)                 | 8.7E-5 (0.0005)              | 0.0001 (0.001)                  |
| BMI squared                                | <b>4.1E-5* (6.4E-6)</b>      | <b>-4.1E-5* (6.4E-6)</b>        | <b>-5.5E-5* (8.1E-6)</b>     | <b>-5.5E-5* (8.1E-6)</b>        |
| Education (less than high school graduate) | <b>-0.040* (0.002)</b>       | <b>-0.040* (0.002)</b>          | <b>-0.047* (0.002)</b>       | <b>-0.046* (0.002)</b>          |
| Currently married                          | <b>0.009* (0.001)</b>        | <b>0.009* (0.001)</b>           | <b>0.009* (0.001)</b>        | <b>0.009* (0.001)</b>           |
| Smokes some days                           | <b>-0.042* (0.002)</b>       | <b>-0.042* (0.002)</b>          | <b>-0.039* (0.002)</b>       | <b>-0.039* (0.002)</b>          |
| Smokes every day                           | <b>-0.059* (0.001)</b>       | <b>-0.059* (0.001)</b>          | <b>-0.059* (0.001)</b>       | <b>-0.059* (0.001)</b>          |
| Asthma                                     | <b>-0.064* (0.001)</b>       | <b>-0.063* (0.001)</b>          | <b>-0.063* (0.002)</b>       | <b>-0.062* (0.001)</b>          |
| Diabetes                                   | <b>-0.058* (0.001)</b>       | <b>-0.058* (0.001)</b>          | <b>-0.057* (0.002)</b>       | <b>-0.058* (0.002)</b>          |
| Cardiovascular disease                     | <b>-0.094* (0.002)</b>       | <b>-0.093* (0.002)</b>          | <b>-0.091* (0.003)</b>       | <b>-0.090* (0.002)</b>          |
| Stroke                                     | <b>-0.074* (0.003)</b>       | <b>-0.074* (0.003)</b>          | <b>-0.072* (0.003)</b>       | <b>-0.071* (0.003)</b>          |
| 2009 BRFSS                                 | <b>-0.004* (0.001)</b>       | <b>-0.004* (0.001)</b>          | <b>-0.004* (0.001)</b>       | <b>-0.003* (0.001)</b>          |
| Constant                                   | <b>1.051* (0.007)</b>        | <b>1.051* (0.007)</b>           | <b>1.025* (0.008)</b>        | <b>1.023* (0.008)</b>           |
| <i>N</i>                                   | 194,230                      | 198,880                         | 150,948                      | 155,022                         |
| <i>R-squared</i>                           | 0.194                        | 0.194                           | 0.191                        | 0.191                           |

**Appendix**  
**Breast Cancer in Young Women: Health State Utility Impacts by Race/Ethnicity**  
**Trogon et al.**

| Variable                                   | African American             |                                 | Hispanic                     |                                 |
|--------------------------------------------|------------------------------|---------------------------------|------------------------------|---------------------------------|
|                                            | Diagnosed at age<br>18 to 44 | Diagnosed at age<br>45 or older | Diagnosed at age<br>18 to 44 | Diagnosed at age<br>45 or older |
| Breast cancer                              | -0.057 (0.061)               | <b>-0.051 (0.023)</b>           | -0.096 (0.059)               | <b>-0.063 (0.031)</b>           |
| Years since breast cancer diagnosis        |                              |                                 |                              |                                 |
| 2 to 4 years                               | 0.090 (0.067)                | 0.016 (0.030)                   | -0.125 (0.087)               | 0.004 (0.041)                   |
| 5 to 10 years                              | 0.025 (0.068)                | 0.026 (0.027)                   | 0.123 (0.066)                | 0.042 (0.038)                   |
| More than 10 years                         | 0.031 (0.065)                | <b>0.071* (0.028)</b>           | 0.072 (0.066)                | 0.027 (0.041)                   |
| Age                                        | <b>-0.004* (0.0005)</b>      | <b>-0.004* (0.0004)</b>         | <b>-0.005* (0.001)</b>       | <b>-0.005* (0.001)</b>          |
| Age squared                                | <b>2.7E-5* (4.5E-6)</b>      | <b>2.7E-5* (4.4E-6)</b>         | <b>3.2E-5* (5.2E-6)</b>      | <b>3.1E-5* (5.1E-6)</b>         |
| Household income <\$35,000/year            | <b>-0.050* (0.003)</b>       | <b>-0.051* (0.003)</b>          | <b>-0.047* (0.003)</b>       | <b>-0.048* (0.003)</b>          |
| BMI                                        | -0.001 (0.001)               | -0.001 (0.001)                  | <b>-0.004* (0.001)</b>       | <b>-0.004* (0.001)</b>          |
| BMI squared                                | 2.5E-5 (1.5E-5)              | -2.4E-5 (1.5E-5)                | 1.2E-5 (2.1E-5)              | 1.3E-5 (2.1E-5)                 |
| Education (less than high school graduate) | <b>-0.040* (0.004)</b>       | <b>-0.040* (0.004)</b>          | <b>-0.024* (0.004)</b>       | <b>-0.024* (0.004)</b>          |
| Currently married                          | <b>0.006 (0.003)</b>         | <b>0.006 (0.003)</b>            | <b>0.012* (0.003)</b>        | <b>0.013* (0.003)</b>           |
| Smokes some days                           | <b>-0.047* (0.006)</b>       | <b>-0.048* (0.006)</b>          | <b>-0.049* (0.007)</b>       | <b>-0.048* (0.007)</b>          |
| Smokes every day                           | <b>-0.055* (0.004)</b>       | <b>-0.055* (0.004)</b>          | <b>-0.060* (0.006)</b>       | <b>-0.060 (0.006)</b>           |
| Asthma                                     | <b>-0.056* (0.004)</b>       | <b>-0.056* (0.004)</b>          | <b>-0.072* (0.005)</b>       | <b>-0.072* (0.005)</b>          |
| Diabetes                                   | <b>-0.054* (0.004)</b>       | <b>-0.052* (0.004)</b>          | <b>-0.060* (0.005)</b>       | <b>-0.059* (0.005)</b>          |
| Cardiovascular disease                     | <b>-0.100* (0.007)</b>       | <b>-0.097* (0.007)</b>          | <b>-0.103* (0.009)</b>       | <b>-0.101* (0.009)</b>          |
| Stroke                                     | <b>-0.074* (0.007)</b>       | <b>-0.074* (0.007)</b>          | <b>-0.081* (0.011)</b>       | <b>-0.081* (0.011)</b>          |
| 2009 BRFSS                                 | 0.001 (0.004)                | 0.001 (0.004)                   | -0.002 (0.004)               | -0.002 (0.004)                  |
| Constant                                   | <b>1.083* (0.020)</b>        | <b>1.084* (0.019)</b>           | <b>1.161* (0.023)</b>        | <b>1.162* (0.023)</b>           |
| <i>N</i>                                   | 17,997                       | 18,252                          | 14,188                       | 14,341                          |
| <i>R-squared</i>                           | 0.188                        | 0.188                           | 0.195                        | 0.197                           |

*Note:* Boldface indicates statistical significance ( $p < 0.05$ ). \* indicates statistical significance ( $p < 0.01$ ). SEs are robust.  
 HSU, health state utility.

**Appendix**  
**Breast Cancer in Young Women: Health State Utility Impacts by Race/Ethnicity**  
**Trogon et al.**

**Appendix Table 3.** Marginal Effects of Breast Cancer From Regression Analysis: Pooled Across Race/Ethnicity<sup>a</sup>

| Variable                              | Overall healthy days      |                              | Physically healthy days   |                              |
|---------------------------------------|---------------------------|------------------------------|---------------------------|------------------------------|
|                                       | Diagnosed at age 18 to 44 | Diagnosed at age 45 or older | Diagnosed at age 18 to 44 | Diagnosed at age 45 or older |
| Breast cancer + years since diagnosis |                           |                              |                           |                              |
| 0 to 1 year                           | <b>-6.865* (1.125)</b>    | <b>-3.495** (0.429)</b>      | <b>-6.836* (1.087)</b>    | <b>-3.672*(**) (0.408)</b>   |
| 2 to 4 years                          | <b>-2.123* (0.813)</b>    | <b>-1.147* (0.295)</b>       | <b>-1.753* (0.665)</b>    | <b>-0.996* (0.262)</b>       |
| 5 to 10 years                         | <b>-1.237 (0.571)</b>     | <b>-0.498 (0.227)</b>        | -0.288 (0.423)            | -0.331 (0.197)               |
| More than 10 years                    | <b>-1.326* (0.350)</b>    | <b>-1.000* (0.237)</b>       | <b>-1.337* (0.313)</b>    | <b>-0.905* (0.218)</b>       |
| <i>N</i>                              | 194,896                   | 199,575                      | 196,650                   | 201,383                      |
| <i>R-squared</i>                      | 0.123                     | 0.122                        | 0.125                     | 0.125                        |
|                                       | Mentally healthy Days     |                              |                           |                              |
| Variable                              | Diagnosed at age 18 to 44 | Diagnosed at age 45 or Older |                           |                              |
| Breast cancer + years since diagnosis |                           |                              |                           |                              |
| 0 to 1 year                           | <b>-1.929 (0.861)</b>     | <b>-0.806* (0.292)</b>       |                           |                              |
| 2 to 4 years                          | -0.990 (0.670)            | <b>-0.420 (0.212)</b>        |                           |                              |
| 5 to 10 years                         | -0.925 (0.488)            | -0.209 (0.159)               |                           |                              |
| More than 10 years                    | <b>-0.729* (0.271)</b>    | <b>-0.301 (0.145)</b>        |                           |                              |
| <i>N</i>                              | 197,265                   | 202,058                      |                           |                              |
| <i>R-squared</i>                      | 0.081                     | 0.080                        |                           |                              |

Note: Boldface indicates statistical significance ( $p < 0.05$ ). \* $p < 0.01$ . \*\*Chow test indicates statistically significant differences ( $p < 0.05$ ) between women diagnosed at age 18 to 44 and women diagnosed at age 45 or older. No Chow test was significant at the  $p < 0.01$  level.

<sup>a</sup> Other covariates included in the regression were: race/ethnicity (pooled analysis), age, age squared, household income <\$35,000/year, BMI, BMI squared, education (less than high school graduate), currently married, smokes some days, smokes every day, asthma, diabetes, cardiovascular disease, stroke, and an indicator for 2009 BRFSS. Full regression results are available in the Appendix. SEs are robust.

**Appendix**  
**Breast Cancer in Young Women: Health State Utility Impacts by Race/Ethnicity**  
**Trogon et al.**

**Appendix Table 4.** Marginal Effects of Breast Cancer on Mapped HSU From Regression Analysis Using Matched Samples<sup>a</sup>

| Variable                              | All races/ethnicities     |                              | White                     |                              |
|---------------------------------------|---------------------------|------------------------------|---------------------------|------------------------------|
|                                       | Diagnosed at age 15 to 44 | Diagnosed at age 45 or older | Diagnosed at age 15 to 44 | Diagnosed at age 45 or older |
| Breast cancer + years since diagnosis |                           |                              |                           |                              |
| 0 to 1 year                           | <b>-0.103 (0.019)</b>     | <b>-0.076 (0.007)</b>        | <b>-0.112 (0.022)</b>     | <b>-0.079 (0.008)</b>        |
| 2 to 4 years                          | -0.023 (0.015)            | <b>-0.039 (0.005)</b>        | -0.013 (0.016)            | <b>-0.037 (0.005)</b>        |
| 5 to 10 years                         | -0.017 (0.011)            | <b>-0.018 (0.004)</b>        | -0.018 (0.012)            | <b>-0.018 (0.004)</b>        |
| More than 10 years                    | <b>-0.046 (0.006)</b>     | <b>-0.018** (0.004)</b>      | <b>-0.042 (0.007)</b>     | <b>-0.018** (0.004)</b>      |
| <i>N (unweighted)</i>                 | 8,442                     | 36,300                       | 6,798                     | 31,218                       |
| <i>R-squared</i>                      | 0.012                     | 0.056                        | 0.011                     | 0.031                        |
| Variable                              | African American          |                              | Hispanic                  |                              |
|                                       | Diagnosed at age 15 to 44 | Diagnosed at age 45 or older | Diagnosed at age 15 to 44 | Diagnosed at age 45 or older |
| Breast cancer + years since diagnosis |                           |                              |                           |                              |
| 0 to 1 year                           | -0.052 (0.084)            | -0.039 (0.024)               | -0.052 (0.060)            | -0.051 (0.034)               |
| 2 to 4 years                          | <b>0.068 (0.026)</b>      | <b>-0.043** (0.021)</b>      | <b>-0.184 (0.068)</b>     | <b>-0.079 (0.030)</b>        |
| 5 to 10 years                         | -0.015 (0.034)            | -0.019 (0.015)               | 0.068 (0.037)             | <b>-0.037** (0.024)</b>      |
| More than 10 years                    | <b>-0.054 (0.023)</b>     | <b>0.002** (0.016)</b>       | -0.060 (0.037)            | -0.034 (0.030)               |
| <i>N (unweighted)</i>                 | 738                       | 2,250                        | 384                       | 1,302                        |
| <i>R-squared</i>                      | 0.170                     | 0.004                        | 0.031                     | 0.010                        |

*Note:* Boldface indicates statistical significance ( $p < 0.05$ ). \*\*Chow test indicates statistically significant differences ( $p < 0.05$ ) between women diagnosed at age 15 to 44 and women diagnosed at age 45 or older.

HSU, health state utility.

<sup>a</sup> Other covariates included in the regressions to correct for covariate imbalance were: race/ethnicity, age, age squared, household income <\$35,000/year, currently married, asthma, and an indicator for 2009 BRFSS (all races/ethnicities age 15-44); race/ethnicity, household income <\$35,000/year, education (less than high school graduate), currently married, smokes some days, smokes every day, cardiovascular disease, and an indicator for 2009 BRFSS (all races/ethnicities age 45 or older); age, age squared, household income <\$35,000/year, currently married, asthma, and an indicator for 2009 BRFSS (white age 15-44); household income <\$35,000/year, currently married, cardiovascular disease, and an indicator for 2009 BRFSS (white age 45 or older); an indicator for 2009 BRFSS (African American age 45 or older); household income <\$35,000/year, currently married, smokes some days, smokes every day, and an indicator for 2009 BRFSS (Hispanic age 15-44); and currently married, diabetes, and an indicator for 2009 BRFSS (Hispanic age 45 or older). Full regression results are available in the Appendix. SEs are robust but do not account for uncertainty in propensity score matching.
